# Supplementary material for: Nutrition risk varies according to social network type: data from the Canadian Longitudinal Study on Aging
Source: HighWire-hosted journal article supplement (doi:10.1136/fmch-2022-002112), 2023-02-01
Supplement: fmch-2022-002112supp001_data_supplement.pdf [file fmch-2022-002112supp001_data_supplement.pdf]

Supplemental File - **Nutrition risk varies according to social network type****Characteristics of missing data****Supplemental Table 1.** Missing data for all variables in baseline model.

| <b>Variable</b>                                     | <b>Percent Missing</b> |
|-----------------------------------------------------|------------------------|
| SCREEN-8 score at first follow-up                   | 19.73                  |
| SCREEN-8 score at baseline                          | 13.12                  |
| Frequency of contact with children                  | 12.80                  |
| Frequency of contact with neighbours                | 11.40                  |
| Frequency of contact with siblings                  | 8.97                   |
| Frequency of contact with friends                   | 6.63                   |
| Household income                                    | 6.45                   |
| Frequency of contact with relatives                 | 2.76                   |
| Number of people known through other activities     | 1.99                   |
| Number of living relatives                          | 1.61                   |
| Number of people known through work or school       | 1.24                   |
| Number of neighbours                                | 1.07                   |
| Number of people known through community activities | 1.01                   |
| Social participation                                | 1.00                   |
| Education                                           | 0.39                   |
| Number of close friends                             | 0.30                   |
| Number of siblings                                  | 0.11                   |
| Marital status                                      | 0.03                   |
| Number of living children                           | 0.01                   |
| Sex assigned at birth                               | -                      |
| Age                                                 | -                      |

## Supplemental File - Nutrition risk varies according to social network type

**Supplemental Table 2.** Regression model predicting SCREEN-8 score at baseline

| Characteristic                                           | Beta  | 95% CI <sup>1</sup> | p-value |
|----------------------------------------------------------|-------|---------------------|---------|
| <b>Social network type</b>                               |       |                     |         |
| Restricted                                               | —     | —                   |         |
| Few friends                                              | 0.153 | -0.258, 0.564       | 0.465   |
| Diverse                                                  | 1.376 | 0.951, 1.801        | <0.001  |
| Family focused                                           | 0.928 | 0.503, 1.353        | <0.001  |
| Community focused                                        | 1.125 | 0.693, 1.556        | <0.001  |
| Close family                                             | 1.086 | 0.646, 1.525        | <0.001  |
| Few siblings                                             | 0.767 | 0.364, 1.169        | <0.001  |
| Age                                                      | 0.037 | 0.027, 0.048        | <0.001  |
| <b>Sex assigned at birth</b>                             |       |                     |         |
| Male                                                     | —     | —                   |         |
| Female                                                   | 0.035 | -0.143, 0.212       | 0.702   |
| <b>Marital status</b>                                    |       |                     |         |
| Married or Partnered                                     | —     | —                   |         |
| Single (Single, Divorced, Separated)                     | 1.000 | 1.000, 1.000        | <0.001  |
| Widowed                                                  | 1.000 | 1.000, 1.000        | <0.001  |
| <b>Educational attainment</b>                            |       |                     |         |
| Less than secondary                                      | —     | —                   |         |
| Secondary school graduation, no post-secondary education | 0.718 | 0.264, 1.173        | 0.002   |
| Some post-secondary education                            | 0.680 | 0.180, 1.179        | 0.008   |
| Post-secondary degree/diploma                            | 1.265 | 0.865, 1.664        | <0.001  |
| <b>Household income</b>                                  |       |                     |         |
| Less than \$20,000                                       | —     | —                   |         |
| \$20,000 or more, but less than \$50,000                 | 1.530 | 1.036, 2.024        | <0.001  |
| \$50,000 or more, but less than \$100,000                | 2.149 | 1.650, 2.649        | <0.001  |
| \$100,000 or more                                        | 2.559 | 2.040, 3.079        | <0.001  |

<sup>1</sup>CI = Confidence Interval

## Supplemental File - Nutrition risk varies according to social network type

**Supplemental Table 3.** Regression model predicting SCREEN-8 score at follow up

| Characteristic                                           | Beta  | 95% CI <sup>1</sup> | p-value |
|----------------------------------------------------------|-------|---------------------|---------|
| <b>Social network type</b>                               |       |                     |         |
| Restricted                                               | —     | —                   |         |
| Few friends                                              | 0.251 | -0.171, 0.673       | 0.244   |
| Diverse                                                  | 1.440 | 1.003, 1.877        | <0.001  |
| Family focused                                           | 0.716 | 0.278, 1.153        | 0.001   |
| Community focused                                        | 0.964 | 0.521, 1.407        | <0.001  |
| Close family                                             | 0.896 | 0.443, 1.348        | <0.001  |
| Few siblings                                             | 0.785 | 0.372, 1.199        | <0.001  |
| Age                                                      | 0.016 | 0.006, 0.027        | 0.003   |
| <b>Sex assigned at birth</b>                             |       |                     |         |
| Male                                                     | —     | —                   |         |
| Female                                                   | 0.205 | 0.021, 0.389        | 0.029   |
| <b>Marital status</b>                                    |       |                     |         |
| Married or Partnered                                     | —     | —                   |         |
| Single (Single, Divorced, Separated)                     | 1.000 | 1.000, 1.000        | <0.001  |
| Widowed                                                  | 1.000 | 1.000, 1.000        | <0.001  |
| <b>Educational attainment</b>                            |       |                     |         |
| Less than secondary                                      | —     | —                   |         |
| Secondary school graduation, no post-secondary education | 0.480 | 0.011, 0.950        | 0.045   |
| Some post-secondary education                            | 0.361 | -0.156, 0.879       | 0.171   |
| Post-secondary degree/diploma                            | 0.918 | 0.505, 1.332        | <0.001  |
| <b>Household income</b>                                  |       |                     |         |
| Less than \$20,000                                       | —     | —                   |         |
| \$20,000 or more, but less than \$50,000                 | 1.228 | 0.727, 1.729        | <0.001  |
| \$50,000 or more, but less than \$100,000                | 2.245 | 1.738, 2.751        | <0.001  |
| \$100,000 or more                                        | 2.498 | 1.971, 3.026        | <0.001  |

<sup>1</sup>CI = Confidence Interval

## Supplemental File - Nutrition risk varies according to social network type

**Supplemental Table 4.** Binary logistic regression model predicting high nutrition risk at baseline

| Characteristic                                           | OR <sup>1</sup> | 95% CI <sup>1</sup> | p-value |
|----------------------------------------------------------|-----------------|---------------------|---------|
| <b>Social network type</b>                               |                 |                     |         |
| Restricted                                               | —               | —                   |         |
| Few friends                                              | 0.930           | 0.781, 1.108        | 0.414   |
| Diverse                                                  | 0.639           | 0.530, 0.771        | <0.001  |
| Family focused                                           | 0.746           | 0.621, 0.897        | 0.002   |
| Community focused                                        | 0.767           | 0.636, 0.926        | 0.006   |
| Close family                                             | 0.714           | 0.590, 0.865        | <0.001  |
| Few siblings                                             | 0.801           | 0.674, 0.953        | 0.012   |
| Age                                                      | 0.982           | 0.978, 0.987        | <0.001  |
| <b>Sex assigned at birth</b>                             |                 |                     |         |
| Male                                                     | —               | —                   |         |
| Female                                                   | 1.054           | 0.973, 1.142        | 0.196   |
| <b>Marital status</b>                                    |                 |                     |         |
| Married or Partnered                                     | —               | —                   |         |
| Single (Single, Divorced, Separated)                     | 1.813           | 1.627, 2.019        | <0.001  |
| Widowed                                                  | 2.101           | 1.788, 2.467        | <0.001  |
| <b>Educational attainment</b>                            |                 |                     |         |
| Less than secondary                                      | —               | —                   |         |
| Secondary school graduation, no post-secondary education | 0.822           | 0.679, 0.995        | 0.043   |
| Some post-secondary education                            | 0.913           | 0.740, 1.126        | 0.395   |
| Post-secondary degree/diploma                            | 0.664           | 0.562, 0.786        | <0.001  |
| <b>Household income</b>                                  |                 |                     |         |
| Less than \$20,000                                       | —               | —                   |         |
| \$20,000 or more, but less than \$50,000                 | 0.669           | 0.550, 0.814        | <0.001  |
| \$50,000 or more, but less than \$100,000                | 0.532           | 0.436, 0.650        | <0.001  |
| \$100,000 or more                                        | 0.469           | 0.380, 0.579        | <0.001  |

<sup>1</sup>OR = Odds Ratio, CI = Confidence Interval

## Supplemental File - Nutrition risk varies according to social network type

**Supplemental Table 5.** Binary logistic regression model predicting high nutrition risk at follow up

| Characteristic                                           | OR <sup>1</sup> | 95% CI <sup>1</sup> | p-value |
|----------------------------------------------------------|-----------------|---------------------|---------|
| <b>Social network type</b>                               |                 |                     |         |
| Restricted                                               | —               | —                   |         |
| Few friends                                              | 0.973           | 0.827, 1.145        | 0.739   |
| Diverse                                                  | 0.671           | 0.565, 0.798        | <0.001  |
| Family focused                                           | 0.898           | 0.758, 1.064        | 0.212   |
| Community focused                                        | 0.780           | 0.656, 0.929        | 0.005   |
| Close family                                             | 0.776           | 0.650, 0.926        | 0.005   |
| Few siblings                                             | 0.874           | 0.745, 1.026        | 0.099   |
| Age                                                      | 0.992           | 0.988, 0.996        | <0.001  |
| <b>Sex assigned at birth</b>                             |                 |                     |         |
| Male                                                     | —               | —                   |         |
| Female                                                   | 0.936           | 0.870, 1.008        | 0.079   |
| <b>Marital status</b>                                    |                 |                     |         |
| Married or Partnered                                     | —               | —                   |         |
| Single (Single, Divorced, Separated)                     | 1.799           | 1.625, 1.991        | <0.001  |
| Widowed                                                  | 1.878           | 1.614, 2.184        | <0.001  |
| <b>Educational attainment</b>                            |                 |                     |         |
| Less than secondary                                      | —               | —                   |         |
| Secondary school graduation, no post-secondary education | 0.850           | 0.711, 1.017        | 0.075   |
| Some post-secondary education                            | 0.906           | 0.743, 1.104        | 0.326   |
| Post-secondary degree/diploma                            | 0.707           | 0.605, 0.828        | <0.001  |
| <b>Household income</b>                                  |                 |                     |         |
| Less than \$20,000                                       | —               | —                   |         |
| \$20,000 or more, but less than \$50,000                 | 0.713           | 0.591, 0.859        | <0.001  |
| \$50,000 or more, but less than \$100,000                | 0.535           | 0.443, 0.647        | <0.001  |
| \$100,000 or more                                        | 0.478           | 0.392, 0.583        | <0.001  |

<sup>1</sup>OR = Odds Ratio, CI = Confidence Interval
